# Supplementary material
Source: PubMed Central journal article supplement (PMC4306680)
Supplement: supp_M052464_jlr.M052464-1.pdf [file supp_M052464_jlr.M052464-1.pdf]

## Supplemental table 1.

### Characterization of plasma metabolites that were influenced by PPAR $\alpha$ activation in mice treated with bezafibrate.

| RT (min) | Detected mass | Actual mass | Change in (% of Cont) | P-value                        | Estimate molecular formula                                                   | Estimate metabolite                                  |
|----------|---------------|-------------|-----------------------|--------------------------------|------------------------------------------------------------------------------|------------------------------------------------------|
| 4.038    | 156.0769      | 155.0696    | 142                   | 1.55 $\times$ 10 <sup>-3</sup> | C <sub>6</sub> H <sub>9</sub> N <sub>3</sub> O <sub>2</sub>                  | L-Histidine                                          |
| 4.472    | 113.02384     | 114.03112   | 60                    | 1.71 $\times$ 10 <sup>-2</sup> | C <sub>5</sub> H <sub>6</sub> O <sub>3</sub>                                 | 2-Hydroxy-2,4-pentadienoate                          |
| 4.476    | 179.05526     | 134.05705   | 65                    | 3.80 $\times$ 10 <sup>-2</sup> | C <sub>5</sub> H <sub>10</sub> O <sub>4</sub>                                | Deoxyribose                                          |
| 4.4771   | 119.03445     | 120.04173   | 61                    | 2.48 $\times$ 10 <sup>-2</sup> | C <sub>4</sub> H <sub>8</sub> O <sub>4</sub>                                 | D-Erythrose                                          |
| 4.08     | 84.0805       | 83.0733     | 192                   | 8.41 $\times$ 10 <sup>-4</sup> | C <sub>5</sub> H <sub>9</sub> N <sub>1</sub>                                 | Piperidine                                           |
| 4.499    | 216.92197     | 215.91469   | 212                   | 1.22 $\times$ 10 <sup>-2</sup> | C <sub>9</sub> H <sub>3</sub> O <sub>3</sub> Cl <sub>3</sub>                 | 3-Chloro-4-(dichloromethyl)-5-hydroxy-2(5H)-furanone |
| 7.249    | 166.0863      | 165.079     | 159                   | 4.72 $\times$ 10 <sup>-3</sup> | C <sub>9</sub> H <sub>11</sub> N <sub>1</sub> O <sub>2</sub>                 | L-Phenylalanine                                      |
| 7.275    | 103.03992     | 58.0417     | 184                   | 9.70 $\times$ 10 <sup>-3</sup> | C <sub>3</sub> H <sub>6</sub> O <sub>1</sub>                                 | Acetone                                              |
| 7.286    | 218.10291     | 219.11018   | 194                   | 4.09 $\times$ 10 <sup>-4</sup> | C <sub>9</sub> H <sub>17</sub> N <sub>1</sub> O <sub>5</sub>                 | Pantothenate                                         |
| 7.3      | 188.07        | 187.06273   | 186                   | 1.32 $\times$ 10 <sup>-6</sup> | C <sub>6</sub> H <sub>10</sub> N <sub>5</sub> Cl <sub>1</sub>                | Deethylatrazine                                      |
| 8.043    | 163.06056     | 164.06784   | 16                    | 1.92 $\times$ 10 <sup>-5</sup> | C <sub>6</sub> H <sub>12</sub> O <sub>5</sub>                                | L-Rhamnose                                           |
| 8.045    | 117.05531     | 72.057107   | 28                    | 7.22 $\times$ 10 <sup>-6</sup> | C <sub>4</sub> H <sub>8</sub> O <sub>1</sub>                                 | Butanal                                              |
| 10.45    | 172.09744     | 173.10471   | 495                   | 2.79 $\times$ 10 <sup>-4</sup> | C <sub>8</sub> H <sub>15</sub> N <sub>1</sub> O <sub>3</sub>                 | N-Acetyl-L-leucine                                   |
| 12.93    | 245.09231     | 246.09958   | 301                   | 2.78 $\times$ 10 <sup>-5</sup> | C <sub>13</sub> H <sub>14</sub> N <sub>2</sub> O <sub>3</sub>                | N-Acetyl-D-tryptophan                                |
| 13.61    | 204.06608     | 205.07335   | 470                   | 4.41 $\times$ 10 <sup>-6</sup> | C <sub>11</sub> H <sub>11</sub> N <sub>1</sub> O <sub>3</sub>                | Indolelactate                                        |
| 27.46    | 518.32262     | 517.31534   | 421                   | 5.61 $\times$ 10 <sup>-8</sup> | C <sub>26</sub> H <sub>48</sub> N <sub>1</sub> O <sub>7</sub> P <sub>1</sub> | LPC(18:3)                                            |
| 27.76    | 494.324       | 493.3167    | 496                   | 1.72 $\times$ 10 <sup>-6</sup> | C <sub>24</sub> H <sub>48</sub> N <sub>1</sub> O <sub>7</sub> P <sub>1</sub> | LPC(16:1)                                            |
| 28.45    | 502.2927      | 501.2854    | 172                   | 2.75 $\times$ 10 <sup>-3</sup> | C <sub>25</sub> H <sub>44</sub> N <sub>1</sub> O <sub>7</sub> P <sub>1</sub> | LPE(20:4)                                            |
| 29.16    | 520.3397      | 519.3324    | 176                   | 7.42 $\times$ 10 <sup>-7</sup> | C <sub>26</sub> H <sub>50</sub> N <sub>1</sub> O <sub>7</sub> P <sub>1</sub> | LPC(18:2)                                            |
| 29.21    | 544.3397      | 543.3324    | 86                    | 2.61 $\times$ 10 <sup>-2</sup> | C <sub>28</sub> H <sub>50</sub> N <sub>1</sub> O <sub>7</sub> P <sub>1</sub> | LPC(20:4)                                            |
| 30.31    | 496.33866     | 495.33139   | 205                   | 7.03 $\times$ 10 <sup>-8</sup> | C <sub>24</sub> H <sub>50</sub> N <sub>1</sub> O <sub>7</sub> P <sub>1</sub> | LPC(16:0)                                            |
| 30.74    | 454.2927      | 453.2855    | 307                   | 6.99 $\times$ 10 <sup>-6</sup> | C <sub>21</sub> H <sub>44</sub> N <sub>1</sub> O <sub>7</sub> P <sub>1</sub> | LPE(16:0)                                            |
| 31.77    | 506.32379     | 507.33106   | 349                   | 1.08 $\times$ 10 <sup>-5</sup> | C <sub>25</sub> H <sub>50</sub> N <sub>1</sub> O <sub>7</sub> P <sub>1</sub> | LPC(17:1)                                            |
| 32.05    | 480.3084      | 479.3012    | 558                   | 2.71 $\times$ 10 <sup>-7</sup> | C <sub>23</sub> H <sub>46</sub> N <sub>1</sub> O <sub>7</sub> P <sub>1</sub> | LPE(18:1)                                            |
| 32.29    | 522.3553      | 521.348     | 369                   | 4.99 $\times$ 10 <sup>-8</sup> | C <sub>26</sub> H <sub>52</sub> N <sub>1</sub> O <sub>7</sub> P <sub>1</sub> | LPC(18:1)                                            |
| 32.45    | 241.1798      | 242.18708   | 40                    | 5.96 $\times$ 10 <sup>-4</sup> | C <sub>14</sub> H <sub>26</sub> O <sub>3</sub>                               | 14-hydroxy-12-tetradecenoic acid                     |
| 35.42    | 524.3709      | 523.3636    | 120                   | 3.68 $\times$ 10 <sup>-2</sup> | C <sub>26</sub> H <sub>54</sub> N <sub>1</sub> O <sub>7</sub> P <sub>1</sub> | LPC(18:0)                                            |
