# Supplementary material
Source: PubMed Central journal article supplement (PMC4306680)
Supplement: supp_M052464_jlr.M052464-2.pdf [file supp_M052464_jlr.M052464-2.pdf]

## Supplemental table 2.

### Characterization of liver metabolites that were influenced by PPAR $\alpha$ activation in mice treated with bezafibrate.

| RT (min) | Detected mass | Actual mass | Change in (% of Cont) | P-value                | Estimate molecular formula                                                                  | Estimate metabolite             |
|----------|---------------|-------------|-----------------------|------------------------|---------------------------------------------------------------------------------------------|---------------------------------|
| 4.062    | 154.06154     | 155.06882   | 141                   | 7.83 $\times 10^{-3}$  | C <sub>6</sub> H <sub>9</sub> N <sub>3</sub> O <sub>2</sub>                                 | L-Histidine                     |
| 4.068    | 133.09701     | 132.08973   | 185                   | 1.22 $\times 10^{-4}$  | C <sub>9</sub> H <sub>12</sub> N <sub>2</sub> O <sub>2</sub>                                | L-Ornithine                     |
| 4.099    | 156.07658     | 155.06931   | 162                   | 1.30 $\times 10^{-3}$  | C <sub>6</sub> H <sub>9</sub> N <sub>3</sub> O <sub>2</sub>                                 | L-Histidine                     |
| 4.391    | 206.10247     | 207.10975   | 576                   | 2.63 $\times 10^{-11}$ | C <sub>8</sub> H <sub>17</sub> N <sub>1</sub> O <sub>5</sub>                                | N-Ethylglycocyamine             |
| 4.394    | 145.06126     | 146.06854   | 118                   | 2.39 $\times 10^{-2}$  | C <sub>9</sub> H <sub>10</sub> N <sub>2</sub> O <sub>3</sub>                                | L-Glutamine                     |
| 4.411    | 346.05395     | 347.06122   | 207                   | 7.74 $\times 10^{-5}$  | C <sub>10</sub> H <sub>14</sub> N <sub>5</sub> O <sub>7</sub> P <sub>1</sub>                | AMP                             |
| 4.501    | 162.11228     | 161.105     | 368                   | 1.21 $\times 10^{-10}$ | C <sub>7</sub> H <sub>15</sub> N <sub>1</sub> O <sub>3</sub>                                | L-Carnitine                     |
| 4.508    | 146.04529     | 147.05257   | 64                    | 4.84 $\times 10^{-3}$  | C <sub>5</sub> H <sub>9</sub> N <sub>1</sub> O <sub>4</sub>                                 | L-Glutamate                     |
| 4.532    | 132.02971     | 133.03699   | 65                    | 3.32 $\times 10^{-2}$  | C <sub>4</sub> H <sub>7</sub> N <sub>1</sub> O <sub>4</sub>                                 | L-Aspartate                     |
| 4.537    | 119.03454     | 120.04182   | 39                    | 1.08 $\times 10^{-6}$  | C <sub>4</sub> H <sub>8</sub> O <sub>4</sub>                                                | D-Erythrose                     |
| 4.537    | 179.05537     | 134.05717   | 50                    | 3.66 $\times 10^{-7}$  | C <sub>5</sub> H <sub>10</sub> O <sub>4</sub>                                               | Deoxyribose                     |
| 4.541    | 101.02408     | 102.03136   | 42                    | 2.60 $\times 10^{-6}$  | C <sub>4</sub> H <sub>6</sub> O <sub>3</sub>                                                | Acetoacetate                    |
| 4.542    | 161.04488     | 162.05216   | 40                    | 3.70 $\times 10^{-8}$  | C <sub>6</sub> H <sub>10</sub> O <sub>5</sub>                                               | 3-Ethylmalate                   |
| 4.543    | 113.02402     | 114.03129   | 36                    | 1.50 $\times 10^{-6}$  | C <sub>5</sub> H <sub>6</sub> O <sub>3</sub>                                                | 2-Hydroxy-2,4-pentadienoate     |
| 4.621    | 160.13304     | 159.12577   | 344                   | 2.80 $\times 10^{-5}$  | C <sub>8</sub> H <sub>17</sub> N <sub>1</sub> O <sub>2</sub>                                | 3-amino-octanoic acid           |
| 4.645    | 195.05029     | 196.05756   | 206                   | 4.27 $\times 10^{-6}$  | C <sub>6</sub> H <sub>12</sub> O <sub>7</sub>                                               | L-Gulonate                      |
| 4.872    | 371.08144     | 372.08871   | 376                   | 1.61 $\times 10^{-7}$  | C <sub>19</sub> H <sub>17</sub> N <sub>2</sub> O <sub>4</sub> Cl <sub>1</sub>               | Quizalofop-ethyl                |
| 4.993    | 325.04286     | 324.03559   | 191                   | 2.56 $\times 10^{-4}$  | C <sub>9</sub> H <sub>13</sub> N <sub>2</sub> O <sub>9</sub> P <sub>1</sub>                 | UMP                             |
| 5.012    | 285.08248     | 284.07521   | 42                    | 4.86 $\times 10^{-4}$  | C <sub>10</sub> H <sub>12</sub> N <sub>4</sub> O <sub>6</sub>                               | Xanthosine                      |
| 5.063    | 273.00072     | 274.008     | 149                   | 1.25 $\times 10^{-2}$  | C <sub>6</sub> H <sub>11</sub> O <sub>10</sub> P <sub>1</sub>                               | 6-Phospho-2-dehydro-D-gluconate |
| 6.218    | 250.09302     | 249.08574   | 55                    | 3.52 $\times 10^{-3}$  | C <sub>10</sub> H <sub>19</sub> N <sub>1</sub> O <sub>2</sub> S <sub>2</sub>                | S-Acetyldihydroliipoamide       |
| 7.297    | 359.10321     | 358.09594   | 786                   | 1.00 $\times 10^{-3}$  | C <sub>11</sub> H <sub>23</sub> N <sub>2</sub> O <sub>7</sub> P <sub>1</sub> S <sub>1</sub> | Pantetheine 4'-phosphate        |
| 7.318    | 161.0085      | 162.01578   | 35                    | 2.21 $\times 10^{-3}$  | C <sub>5</sub> H <sub>6</sub> O <sub>6</sub>                                                | 4-Hydroxy-2-oxoglutarate        |
| 7.319    | 115.00324     | 70.005034   | 38                    | 8.30 $\times 10^{-4}$  | C <sub>3</sub> H <sub>2</sub> O <sub>2</sub>                                                | Propynoate                      |
| 7.32     | 218.10243     | 219.10971   | 274                   | 2.20 $\times 10^{-4}$  | C <sub>9</sub> H <sub>17</sub> N <sub>1</sub> O <sub>5</sub>                                | Pantothenate                    |
| 7.353    | 166.08608     | 165.07881   | 146                   | 9.26 $\times 10^{-3}$  | C <sub>9</sub> H <sub>11</sub> N <sub>1</sub> O <sub>2</sub>                                | L-Phenylalanine                 |
| 7.364    | 232.15423     | 231.14696   | 740                   | 8.44 $\times 10^{-5}$  | C <sub>11</sub> H <sub>21</sub> N <sub>1</sub> O <sub>4</sub>                               | O-Butanoylcarnitine             |
| 7.377    | 220.11787     | 219.11059   | 272                   | 1.08 $\times 10^{-3}$  | C <sub>9</sub> H <sub>17</sub> N <sub>1</sub> O <sub>5</sub>                                | Pantothenate                    |
| 10.47    | 212.11807     | 211.1108    | 733                   | 4.22 $\times 10^{-2}$  | C <sub>13</sub> H <sub>13</sub> N <sub>3</sub>                                              | Trp-P-1                         |
| 10.88    | 260.18546     | 259.17818   | 1816                  | 3.24 $\times 10^{-5}$  | C <sub>13</sub> H <sub>25</sub> N <sub>1</sub> O <sub>4</sub>                               | O-hexanoyl-R-carnitine          |
| 25.32    | 362.09634     | 363.10362   | 12024                 | 1.23 $\times 10^{-7}$  | C <sub>17</sub> H <sub>18</sub> N <sub>3</sub> O <sub>3</sub> S <sub>1</sub> F <sub>1</sub> | Rufloxacin                      |
| 25.32    | 360.09932     | 315.10111   | 10261                 | 7.25 $\times 10^{-8}$  | C <sub>16</sub> H <sub>15</sub> N <sub>3</sub> F <sub>2</sub> Si <sub>1</sub>               | Flusilazole                     |

## Supplemental table 2 (continue)

|       |           |           |     |                       |                         |                       |
|-------|-----------|-----------|-----|-----------------------|-------------------------|-----------------------|
| 28.72 | 502.29194 | 501.28466 | 179 | $8.60 \times 10^{-4}$ | $C_{25}H_{44}N_1O_7P_1$ | LPE(20:4)             |
| 28.75 | 520.3388  | 519.33152 | 185 | $3.18 \times 10^{-6}$ | $C_{26}H_{50}N_1O_7P_1$ | LPC(18:2)             |
| 28.91 | 544.33876 | 543.33148 | 78  | $4.14 \times 10^{-2}$ | $C_{28}H_{50}N_1O_7P_1$ | LPC(20:4)             |
| 30.41 | 496.33883 | 495.33156 | 309 | $2.53 \times 10^{-3}$ | $C_{24}H_{50}N_1O_7P_1$ | LPC(16:0)             |
| 30.96 | 276.12281 | 275.11553 | 197 | $2.70 \times 10^{-3}$ | $C_{15}H_{17}N_1O_4$    | Dubininidene          |
| 31    | 454.29204 | 453.28477 | 188 | $3.46 \times 10^{-3}$ | $C_{21}H_{44}N_1O_7P_1$ | LPE(16:0)             |
| 31.18 | 330.33606 | 329.32879 | 52  | $6.32 \times 10^{-3}$ | $C_{20}H_{43}N_1O_2$    | N,N-dimethyl-Safingol |
| 31.25 | 496.33886 | 495.33158 | 164 | $1.65 \times 10^{-3}$ | $C_{24}H_{50}N_1O_7P_1$ | PC(O-14:0/2:0)        |
| 31.76 | 522.35444 | 521.34716 | 341 | $1.93 \times 10^{-8}$ | $C_{26}H_{52}N_1O_7P_1$ | PC(P-16:0/2:0)        |
| 32.29 | 480.30755 | 479.30028 | 623 | $2.37 \times 10^{-7}$ | $C_{23}H_{46}N_1O_7P_1$ | LPE(18:1)             |
| 32.52 | 522.35443 | 521.34715 | 418 | $3.87 \times 10^{-6}$ | $C_{26}H_{52}N_1O_7P_1$ | LPC(18:1)             |
| 36.31 | 290.13838 | 289.1311  | 166 | $1.49 \times 10^{-3}$ | $C_{16}H_{19}N_1O_4$    | Balfourodine          |
| 37.5  | 550.38592 | 549.37865 | 576 | $2.32 \times 10^{-5}$ | $C_{28}H_{56}N_1O_7P_1$ | LPC(20:1)             |
| 46.44 | 209.15323 | 208.14595 | 63  | $8.32 \times 10^{-3}$ | $C_{13}H_{20}O_2$       | 4-Heptyloxyphenol     |
