# Supplementary material
Source: PubMed Central journal article supplement (PMC4306680)
Supplement: supp_M052464_jlr.M052464-3.pdf [file supp_M052464_jlr.M052464-3.pdf]

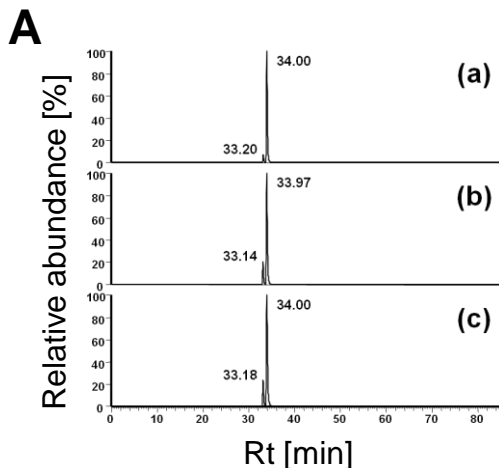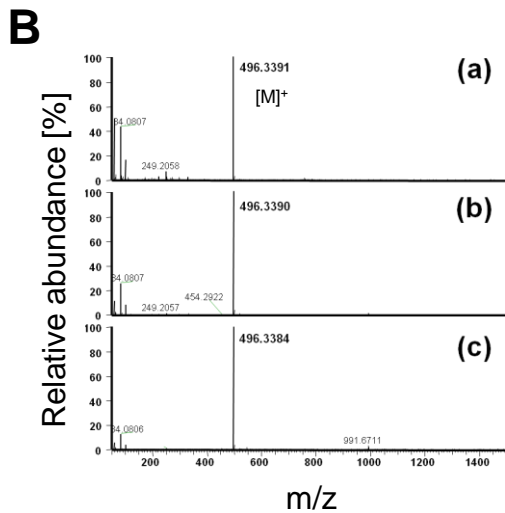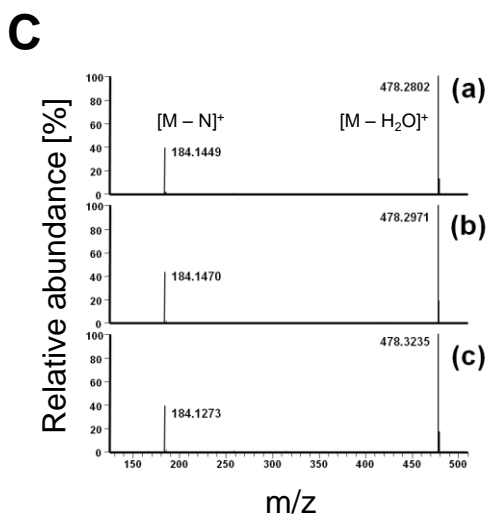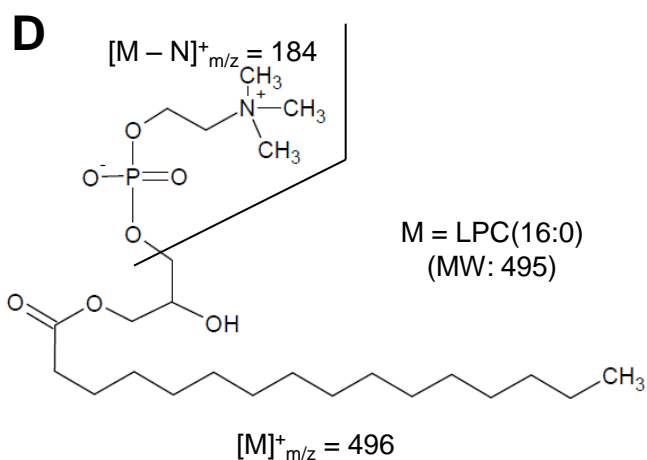

## Supplemental figure 1.

**Identification of LPC(16:0) in mouse plasma by LC-MS. (A)** Rt data, **(B)** full mass data, and **(C)** MS/MS data of LPC(16:0). (a) authentic sample, (b) control plasma sample, (c) treatment bezafibrate plasma sample. The first elution peak (Rt = 33 min) is 2-palmitoyl lysophosphatidylcholine, the second elution peak (Rt = 34 min) is 1-palmitoyl lysophosphatidylcholine. **(D)** the structure of LPC(16:0) and the cleavage pattern of its fragmentation. [M]<sup>+</sup>; H<sup>+</sup> adduct ion. MW; molecular weight.
