# Supplementary material
Source: PubMed Central journal article supplement (PMC4306680)
Supplement: supp_M052464_jlr.M052464-4.pdf [file supp_M052464_jlr.M052464-4.pdf]

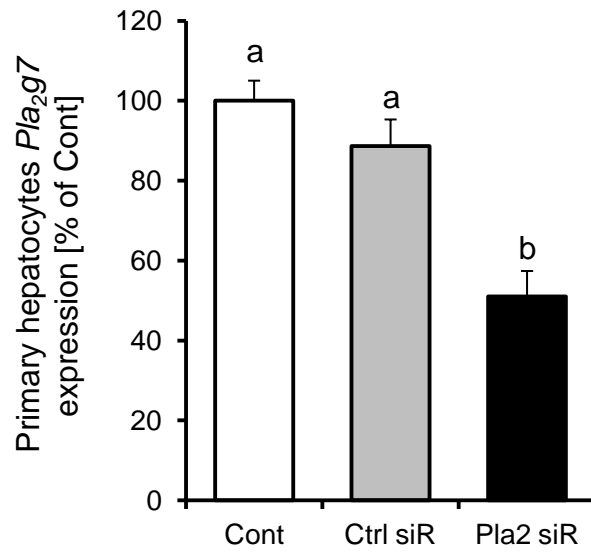

**Supplemental figure 2.**

**The effect of siRNA transfection on *Pla2g7* expression level.** Data are mean  $\pm$  SEM (n = 5-7). Cont; control (non-transfection cells), Ctrl siRNA; control siRNA, Pla2 siRNA; *Pla2g7* siRNA.
